# Supplementary material for: Differences in Biofilm Formation by Methicillin-Resistant and Methicillin-Susceptible Staphylococcus aureus Strains
Source: MDPI journal article supplement (doi:10.3390/diseases11040160), 2023-11-05
Supplement: s1 [file s1]

**Supplementary Table 1.** Source of the *S. aureus* isolates, and the biofilm detection method (BDM) used in the analysis. CV, crystal violet staining. CR, Congo Red Method.

| Ref. | Number and source of the <i>S. aureus</i> isolates                                                                                                     | Medium          | BDM   |
|------|--------------------------------------------------------------------------------------------------------------------------------------------------------|-----------------|-------|
| [7]  | 27 clinical isolates (pus, blood, urine, sputum, urethral swabs, pleural fluid, cerebral spinal fluid) from a Hospital in Nepal.                       | TSB             | CV    |
| [8]  | 75 clinical isolates from urinary tract infections from 4 hospitals in Theran, Iran.                                                                   | TSB 1% gluc.    | CV/CR |
| [9]  | 197 clinical isolates from children with infections, Theran, Iran.                                                                                     | TSB             | CV/CR |
| [10] | 163 samples from nasal swabs, blood, and wounds from the National Reference Center of the Israel Ministry of Health                                    | TSB 0.25% gluc. | CV/CR |
| [11] | 50 samples from pus/burns swab samples from an Intensive Care Unit Hospital, Hamadan, Iran.                                                            | TSB 1% gluc.    | CV    |
| [12] | 135 pus/wound swabs from skin and soft tissue from a Care Center, Theran, Iran.                                                                        | TSB 1% gluc.    | CV/CR |
| [13] | 130 clinical isolates from wound, nose, throat, catheter, blood, urine, sputum, bronchoalveolar washings from hospitals in Siedlce and Warsaw, Poland. | TSB 0.5%        | CV    |
| [14] | 143 clinical samples from admission patients, from 2 hospitals in Babol, Iran.                                                                         | TSB 1% gluc.    | CV    |
| [15] | 209 clinical samples (trachea, blood, wound, sputum, soft tissue, bronchus) from different hospitals, Theran, Iran.                                    | TSB 1% gluc.    | CV    |
| [16] | 35 MSSA and 22 MRSA isolates from nasal swabs from patients and medical students in a Hospital from Amman, Jordan.                                     | TSB 2% gluc.    | CV/CR |
| [17] | 302 MRSA/ 268 MSSA isolates from carriers or infections from patients hospitalized in a Hospital in Gdansk, Poland.                                    | TSB 1% gluc.    | CV/CR |
| [18] | 50 MRSA and 50 MSSA from clinical isolates from Cairo Univ. Hospital, Egypt.                                                                           | TSB 1% gluc.    | CV    |
| [19] | 114 MRSA and 98 MSSA isolates from device-related infections from a Hospital in Dublin, Ireland.                                                       | BHI 1% gluc.    | CV    |
| [20] | 32 isolates (sepsis) from an Intensive Care Unit in a Hospital in Dublin, Ireland.                                                                     | BHI 1% gluc.    | CV    |
| [21] | 100 isolates from blood, urine, wounds, and catheter infections) from a Hospital in Hamadan, Iran.                                                     | Not mentioned   | CV    |
| [22] | 76 isolates from pus/wound swabs from a Hospital in Lalitpur, Nepal.                                                                                   | TSB 2% gluc.    | CV    |
| [23] | 92 clinical isolates from 3 different hospitals in Thailand.                                                                                           | TSB 0.25% gluc. | CV    |
| [24] | 217 clinical isolates (pus, sputum, blood, body fluid, urine) from a Hospital in Kathmandu, Nepal.                                                     | BHI 1% glucose  | CV    |
| [25] | Nasal swabs from volunteer healthcare personnel and medical students from different hospitals in Kathmandu, Nepal.                                     | Not mentioned   | CV    |
| [26] | 300 isolates from catheter-associated infections, wound and soft tissue, and urinary tract infections from 3 hospitals in Hungary.                     | TSB             | CV/CR |
